# Supplementary material for: N-((1H-Pyrrol-2-yl)methylene)-6-methoxypyridin-3-amine and Its Co(II) and Cu(II) Complexes as Antimicrobial Agents: Chemical Preparation, In Vitro Antimicrobial Evaluation, In Silico Analysis and Computational and Theoretical Chemistry Investigations
Source: MDPI journal article supplement (doi:10.3390/molecules27041436), 2022-02-21
Supplement: s1 [file s1]

# **N-((1H-Pyrrol-2-yl)methylene)-6-methoxypyridin-3-amine and Its Co(II) and Cu(II) Complexes as Antimicrobial Agents: Chemical Preparation, In Vitro Antimicrobial Evaluation, In Silico Analysis and Computational and Theoretical Chemistry Investigations**

Vinusha H. Mariwamy <sup>1</sup>, Shiva Prasad Kollur <sup>2,3,\*</sup>, Bindya Shivananda <sup>1</sup>, Muneera Begum <sup>1</sup>, Chandan Shivamallu <sup>4,\*</sup>, Chandan Dharmashekara <sup>4</sup>, Sushma Pradeep <sup>4</sup>, Anisha S. Jain <sup>4</sup>, Shashanka K. Prasad <sup>4</sup>, Asad Syed <sup>5</sup>, Abdallah M. Elgorban <sup>5</sup>, Salim Al-Rejaie <sup>6</sup>, Joaquín Ortega-Castro <sup>7</sup>, Juan Frau <sup>7</sup>, Norma Flores-Holguín <sup>8</sup> and Daniel Glossman-Mitnik <sup>8,\*</sup>

<sup>1</sup> Department of Chemistry, Sri Jayachamarajendra College of Engineering, JSS Science and Technology University, Mysuru 570 006, Karnataka, India; vinushahm@gmail.com (V.H.M.); bindyas@jssuniv.in (B.S.); begum@sjr.ac.in (M.B.)

<sup>2</sup> School of Agriculture, Geography, Environment, Ocean and Natural Sciences (SAGEONS), Laucala Campus, The University of the South Pacific, Suva, Fiji

<sup>3</sup> Department of Sciences, Amrita School of Arts and Sciences, Mysuru Campus, Amrita Vishwa Vidyapeetham, Mysore 570 026, Karnataka, India

<sup>4</sup> Department of Biotechnology and Bioinformatics, School of Life Sciences, JSS Academy of Higher Education and Research, Mysuru 570 026, Karnataka, India; chandand@jssuni.edu.in (C.D.); sushmap@jssuni.edu.in (S.P.); anishajain@jssuni.edu.in (A.S.J.); shashankaprasad@jssuni.edu.in (S.K.P.)

<sup>5</sup> Department of Botany and Microbiology, College of Science, King Saud University, P.O. Box 2455, Riyadh 11451, Saudi Arabia; assyed@ksu.edu.sa (A.S.); aelgorban@ksu.edu.sa (A.M.E.)

<sup>6</sup> Department of Pharmacology and Toxicology, College of Science, King Saud University, P.O. Box 2455, Riyadh 11451, Saudi Arabia; rejaie@ksu.edu.sa

<sup>7</sup> Departament de Química, Universitat de les Illes Balears, E-07122 Palma de Mallorca, Spain; joaquin.castro@uib.es (J.O.-C.); juan.frau@uib.es (J.F.)

<sup>8</sup> Laboratorio Virtual NANOCOSMOS, Departamento de Medio Ambiente y Energía, Centro de Investigación en Materiales Avanzados, Chihuahua 31136, Mexico; norma.flores@cimav.edu.mx

\* Correspondence: shivachemist@gmail.com (S.P.K.); chandans@jssuni.edu.in (C.S.); daniel.glossman@cimav.edu.mx (D.G.-M.)

## **Contents:**

**Figure S1:** Mass spectrum of MPM-Cu(II) complex.

**Figure S2:** Mass spectrum of MPM-Co(II) complex.

**Figure S3:** FT-IR spectrum of MPM-Cu(II) complex.

**Figure S4:** FT-IR spectrum of MPM-Co(II) complex.

**Figure S5:** UV-Visible spectrum of MPM-Cu(II) complex.

**Figure S6:** UV-Visible spectrum of MPM-Co(II) complex.

**Figure S7:** TGA of MPM-Cu(II) complex.

**Figure S8:** TGA of MPM-Co(II) complex.

**Figure S9:** 3D visualization of docking analysis of 6HZQ protease binding with (A) MPM, (B) MPM-Cu(II) and (C) MPM-Co(II).

**Figure S10:** 3D visualization of docking analysis of 6D9T protease binding with (A) MPM, (B) MPM-Cu(II) and (C) MPM-Co(II).

**Figure S11:** 3D visualization of docking analysis of 5MVR protease binding with (A) MPM, (B) MPM-Cu(II) and (C) MPM-Co(II).

**Figure S12:** 3D visualization of docking analysis of 3TOT protease binding with (A) MPM, (B) MPM-Cu(II) and (C) MPM-Co(II).

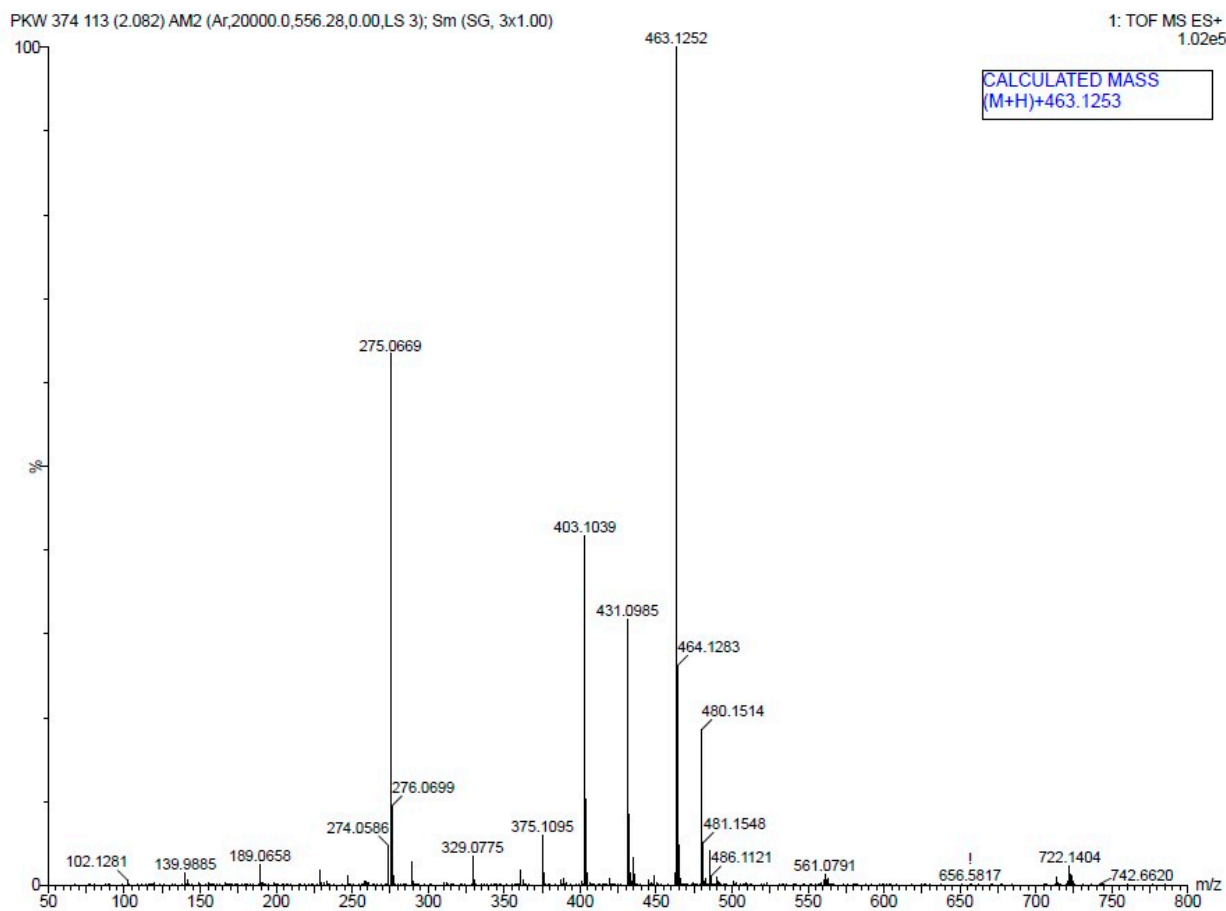

**Figure S1.** Mass spectrum of MPM-Cu(II) complex.

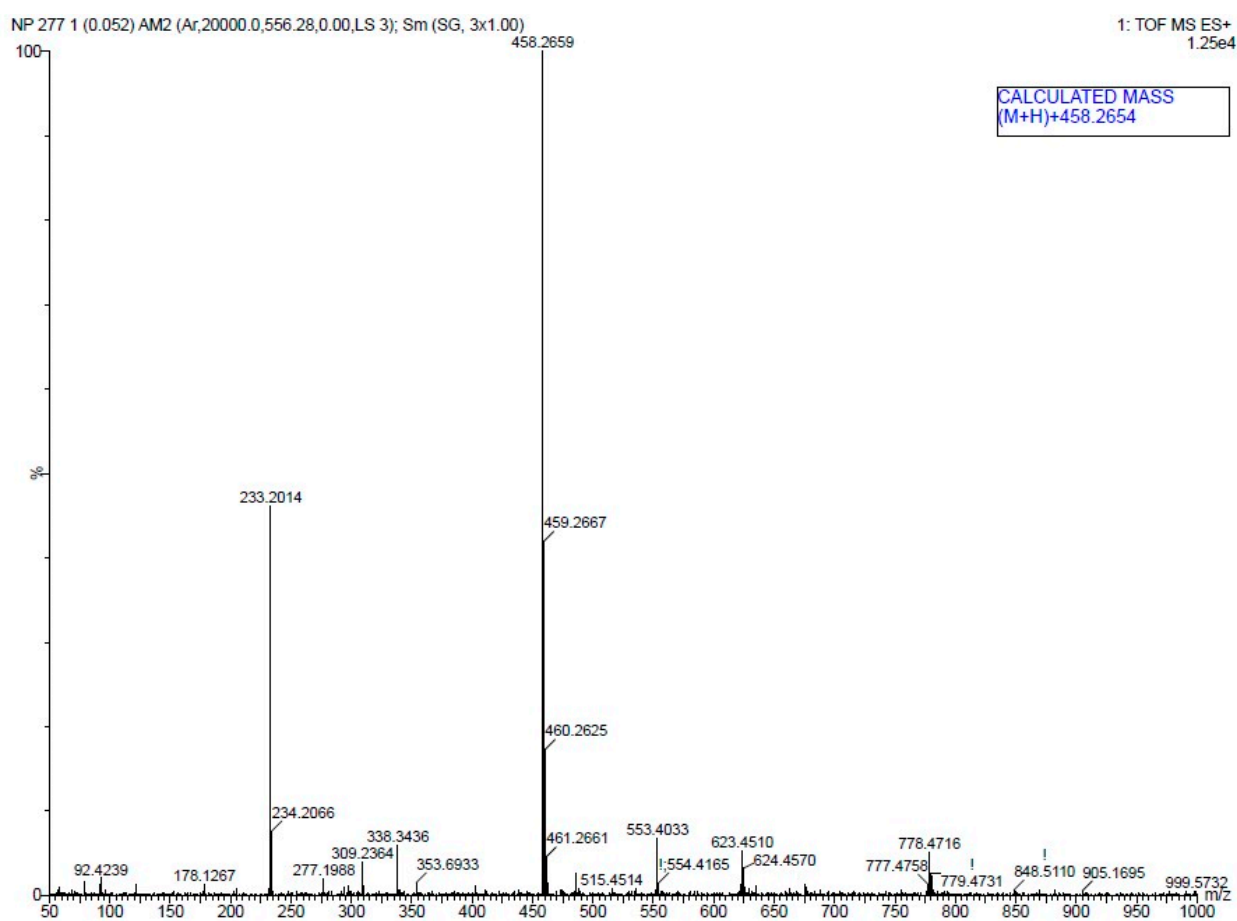

Figure S2. Mass spectrum of MPM-Co(II) complex.

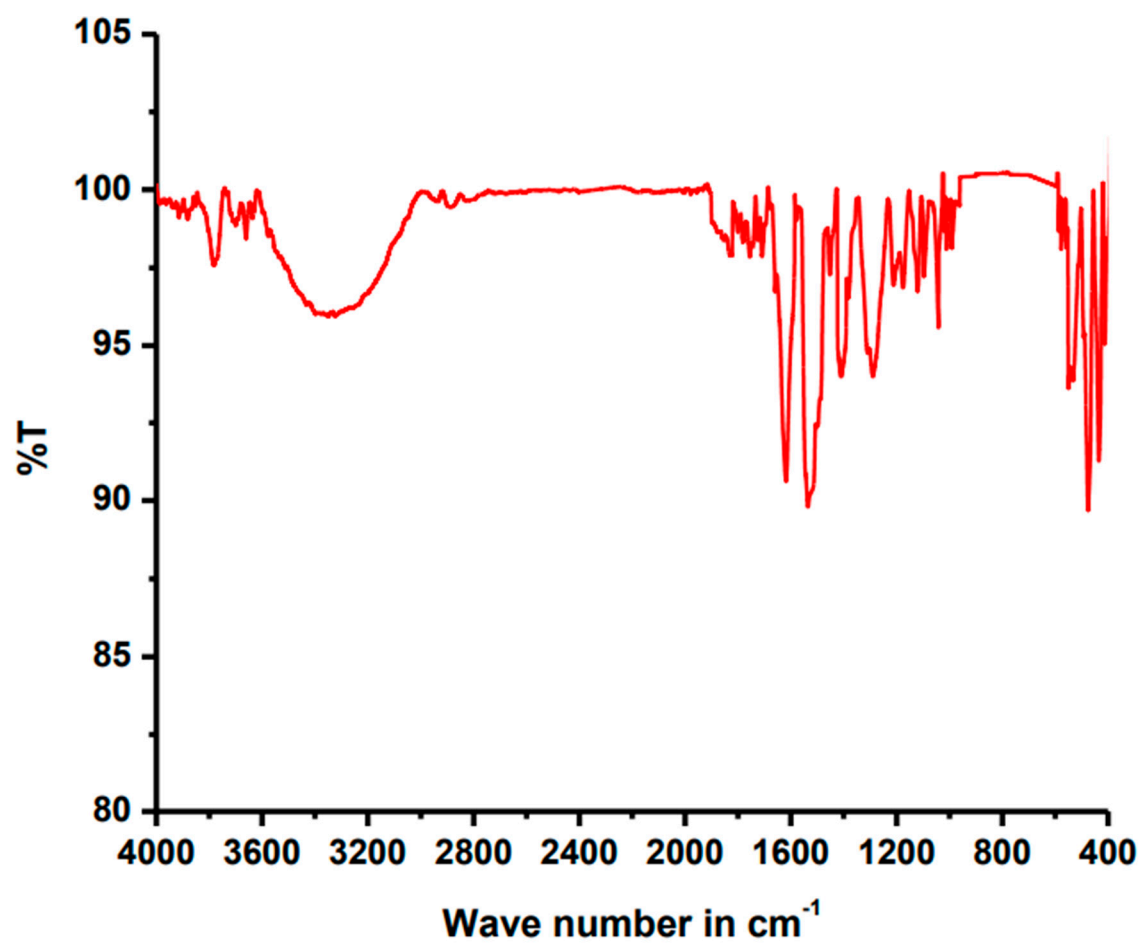

Figure S3. FT-IR spectrum of MPM-Cu(II) complex.

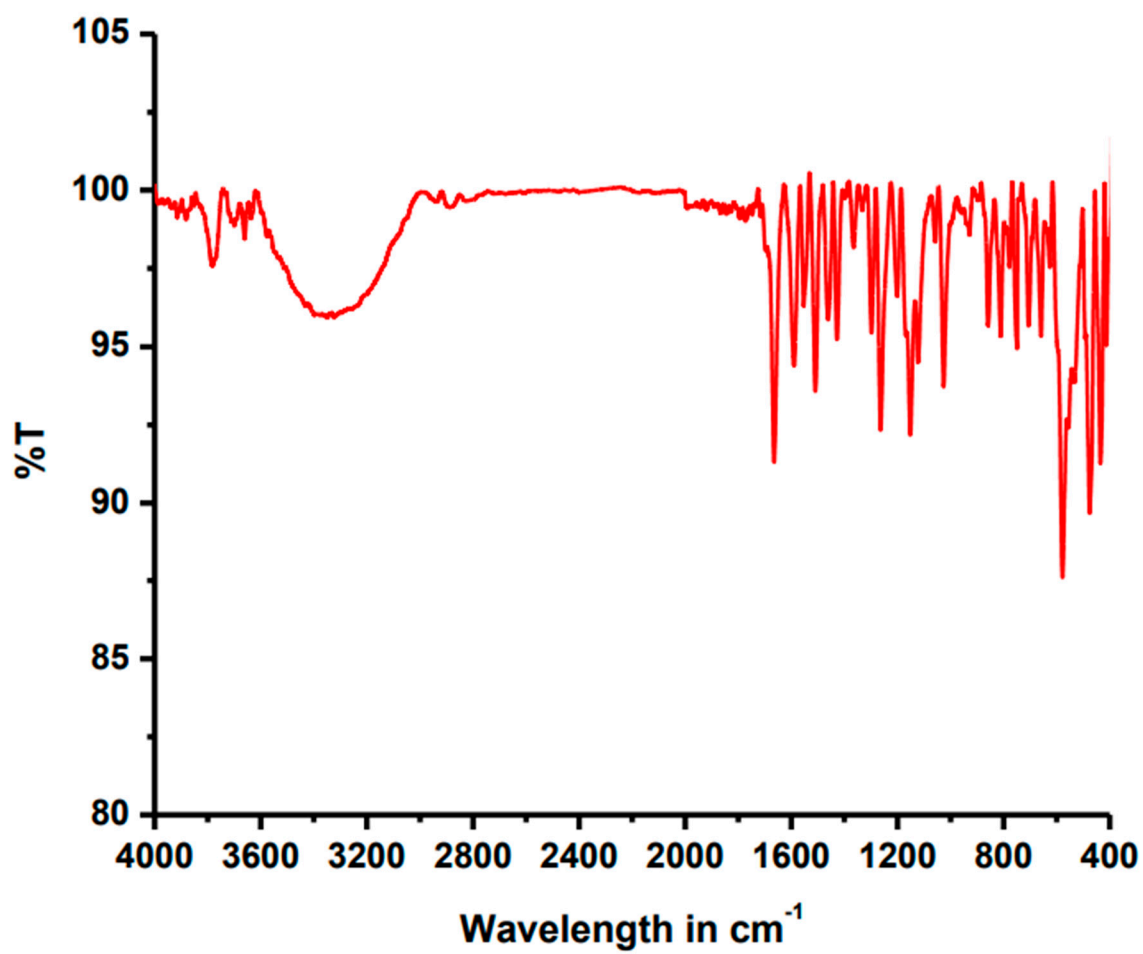

Figure S4. FT-IR spectrum of MPM-Co(II) complex.

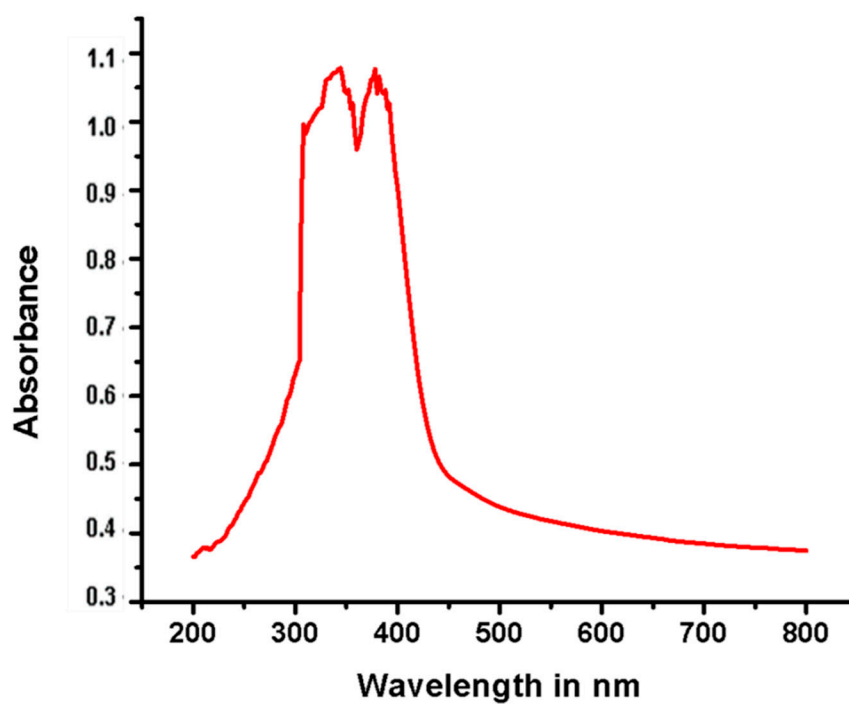

Figure S5. UV-Visible spectrum of MPM-Cu(II) complex.

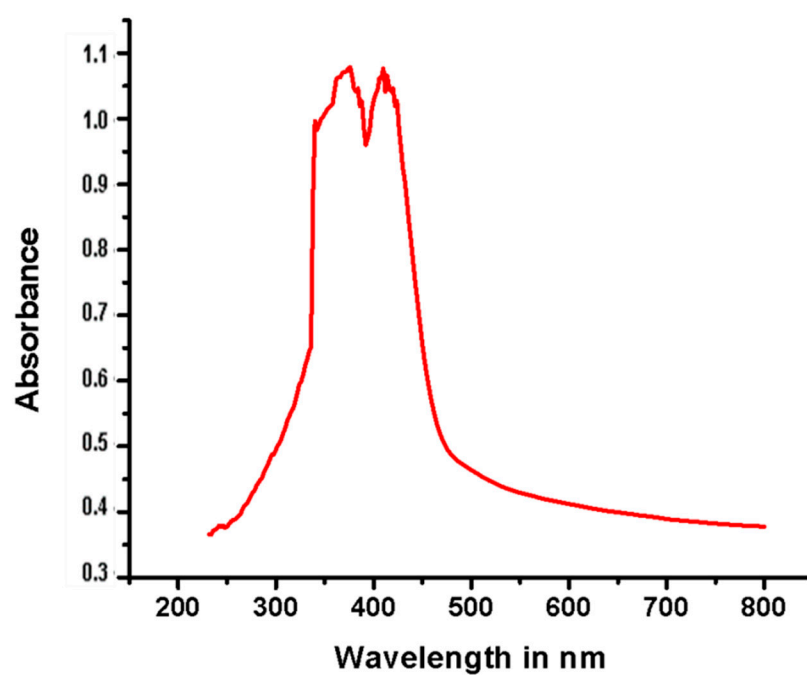

Figure S6. UV-Visible spectrum of MPM-Co(II) complex.

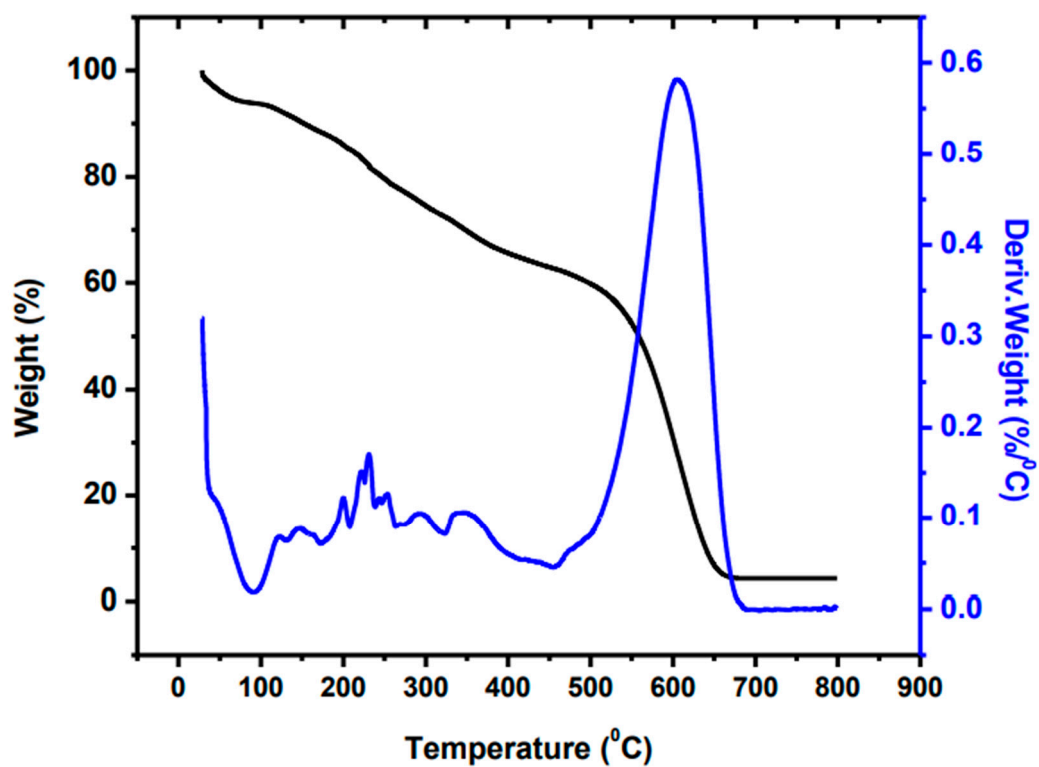

Figure S7. TGA of MPM-Cu(II) complex.

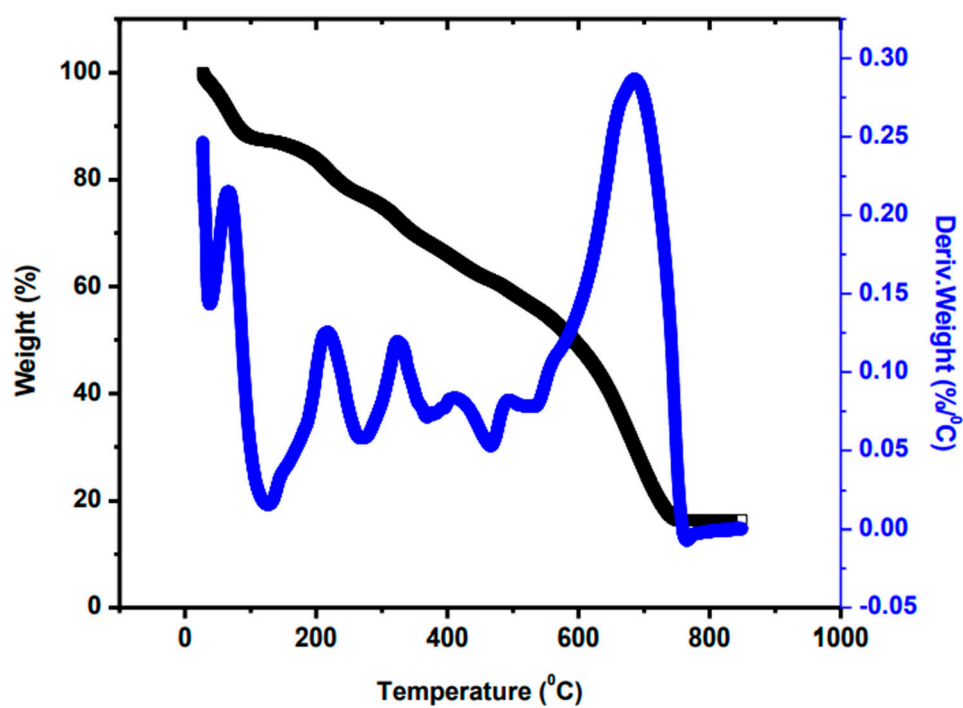

Figure S8. TGA of MPM-Co(II) complex.

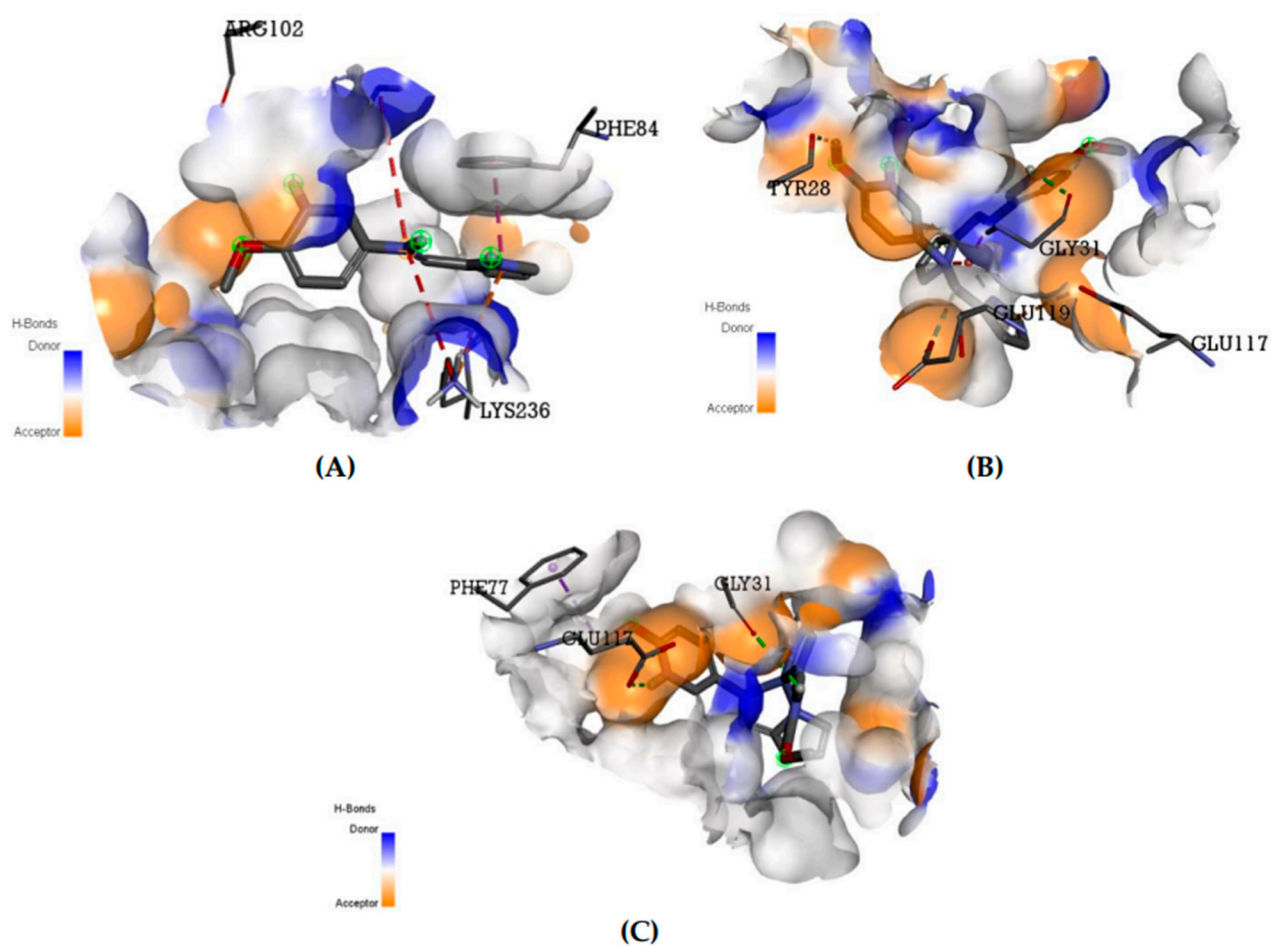

**Figure S9.** 3D visualization of docking analysis of 1QD9 protease binding with (A) MPM, (B) MPM-Cu(II) and (C) MPM-Co(II).



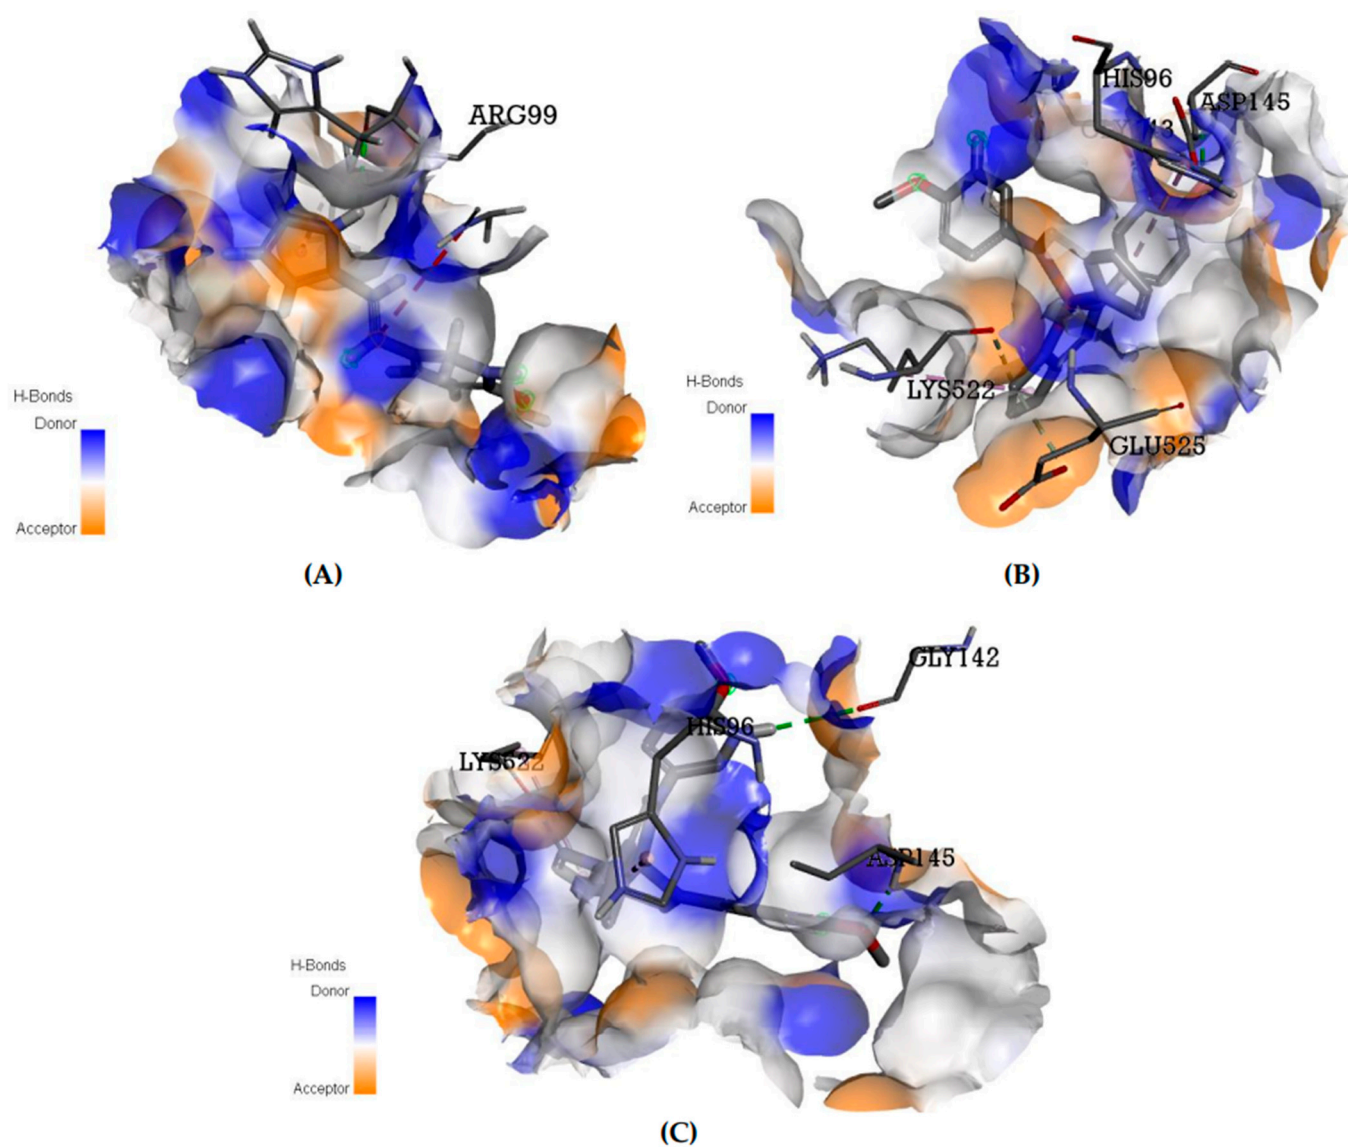

**Figure S10.** 3D visualization of docking analysis of 5C2Z protease binding with (A) MPM, (B) MPM-Cu(II) and (C) MPM-Co(II).

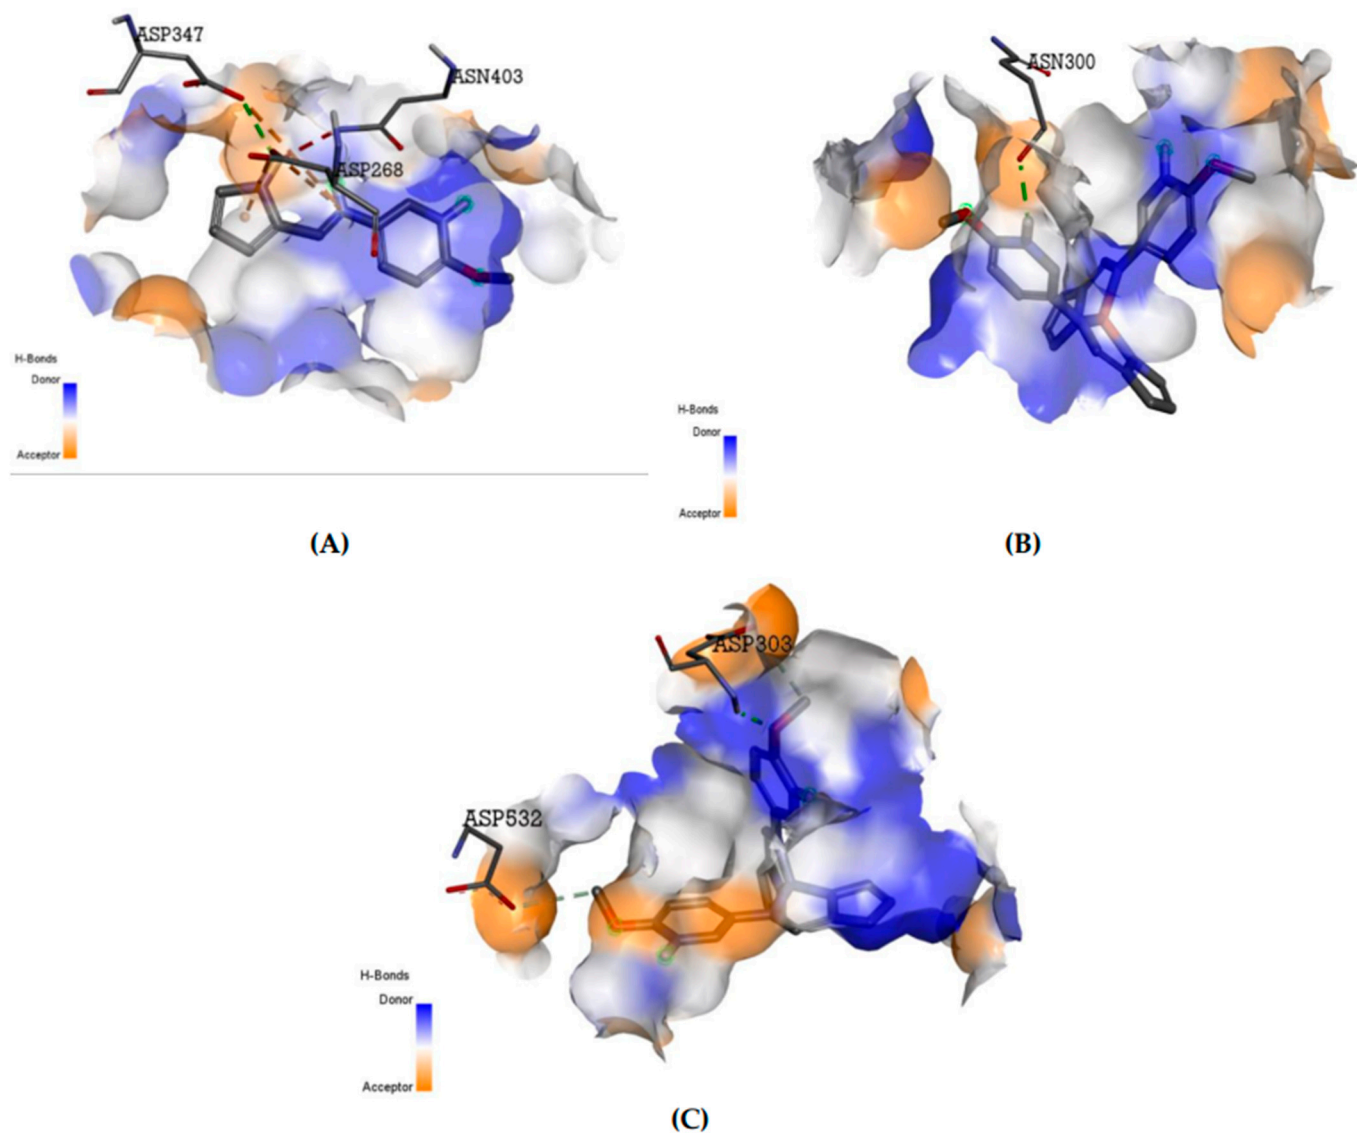

**Figure S11.** 3D visualization of docking analysis of 5I5H protease binding with (A) MPM, (B) MPM-Cu(II) and (C) MPM-Co(II).

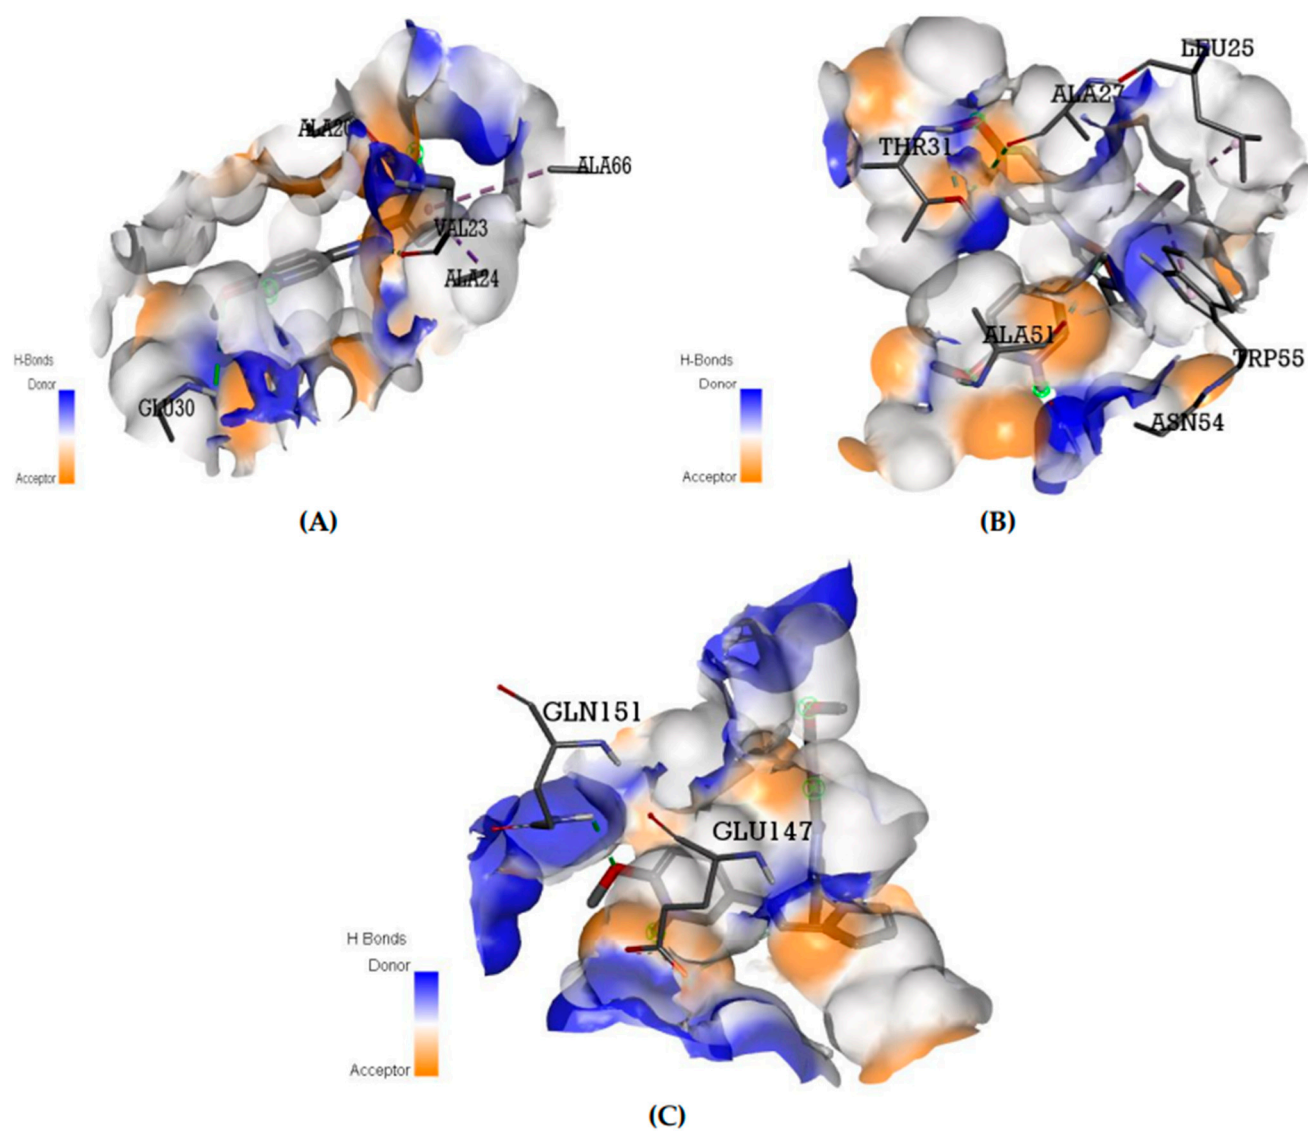

**Figure S12.** 3D visualization of docking analysis of 3O7J protease binding with (A) MPM, (B) MPM-Cu(II) and (C) MPM-Co(II).
